# Supplementary material for: Large-scale differences in microbial biodiversity discovery between 16S amplicon and shotgun sequencing
Source: PubMed Central journal article supplement (PMC5537354; doi:10.1038/s41598-017-06665-3), 2017-07-31
Supplement: 41598_2017_6665_MOESM1_ESM.pdf [file 41598_2017_6665_MOESM1_ESM.pdf]

## **Large-scale differences in microbial biodiversity discovery between 16S amplicon and shotgun sequencing**

**Michael Tessler**<sup>1,2</sup>, **Johannes S. Neumann**<sup>3</sup>, **Ebrahim Afshinnekoo**<sup>4,5,6</sup>, **Michael Pineda**<sup>4,5</sup>, **Rebecca Hersch**<sup>1</sup>, **Luiz Felipe M. Velho**<sup>7,8</sup>, **Bianca T. Segovia**<sup>7</sup>, **Fabio A. Lansac-Toha**<sup>7</sup>, **Michael Lemke**<sup>9</sup>, **Rob DeSalle**<sup>1</sup>, **Christopher E. Mason**<sup>4,5,10</sup> & **Mercer R. Brugler**<sup>1,11</sup>

<sup>1</sup>Sackler Institute for Comparative Genomics, American Museum of Natural History, New York, NY 10024, USA. <sup>2</sup>Richard Gilder Graduate School, American Museum of Natural History, New York, NY 10024, USA. <sup>3</sup>Stiftung Tierärztliche Hochschule Hannover, ITZ - Ecology and Evolution, Bünteweg 17d, D-30559 Hannover, Germany. <sup>4</sup>Department of Physiology and Biophysics, Weill Cornell Medicine, New York, NY 10021, USA. <sup>5</sup>The HRH Prince Alwaleed Bin Talal Bin Abdulaziz Alsaud Institute for Computational Biomedicine, New York, NY, 10021, USA. <sup>6</sup>School of Medicine, New York Medical College, Valhalla, NY, 10595, USA. <sup>7</sup>Universidade Estadual de Maringá, Nupelia / PEA, Maringá, Paraná, Brazil. <sup>8</sup>Unicesumar / Instituto Cesumar de Ciência, Tecnologia e Inovação (ICETI), Maringá, Paraná, Brazil. <sup>9</sup>Biology Department, University of Illinois Springfield, Springfield, IL 62703, USA. <sup>10</sup>The Feil Family Brain and Mind Research Institute (BMRI), New York, NY, 10021, USA. <sup>11</sup>Biological Sciences Department, NYC College of Technology, City University of New York, Brooklyn, NY 11201, USA. Correspondence and requests for materials should be addressed to M.T. (email: [mtessler@amnh.org](mailto:mtessler@amnh.org)), C.E.M. (email: [chm2042@med.cornell.edu](mailto:chm2042@med.cornell.edu)), or M.R.B. (email: [mbrugler@citytech.cuny.edu](mailto:mbrugler@citytech.cuny.edu)).

**Supplementary Figure 1.** Bar plot of finished whole genome sequences for Bacteria and Archaea available from NIH (<https://www.ncbi.nlm.nih.gov/genome/browse/> [December 28, 2016]) summarized by phylum. The number of genomes in the three phyla on the right is given above the bar. Purple bars indicate phyla that are present in both the amplicon and shotgun datasets. Green indicates phyla that are present only from shotgun data, red indicates phyla that are present only from amplicon data, and blue are any phyla not found with either method.

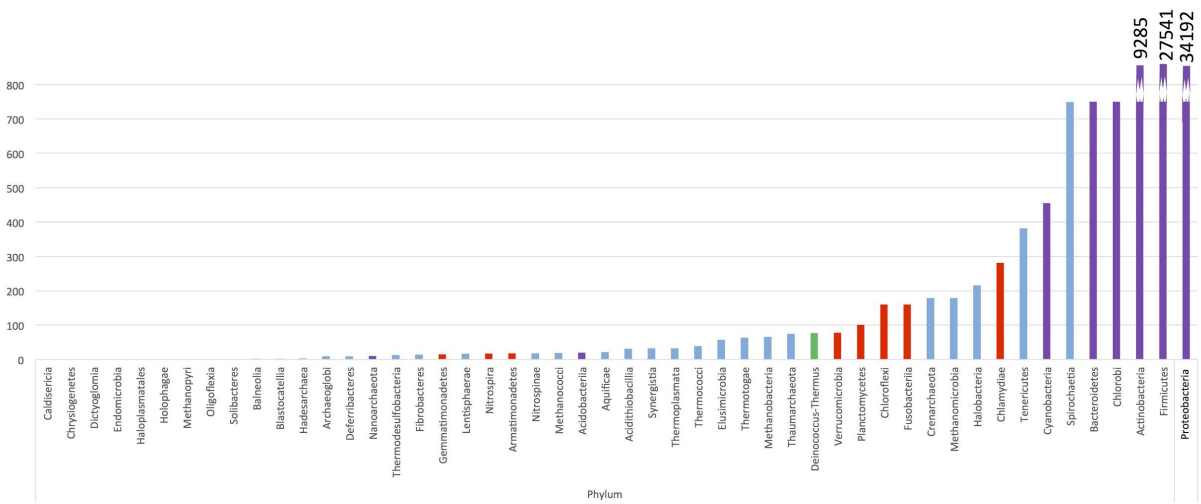

**Supplementary Table 1.** Correspondence between aquatic environmental variables and NMDS ordinations (Illumina shotgun and 454 amplicon sequencing at the phylum and family levels), as found with vector fitting (envfit), and PERMANOVA\*. Significant *p*-values are bolded. First columns summarize significant results; later columns go into detail on *r*<sup>2</sup> and *p* values (significant values bolded).

|                                        | Phylum              |                 | Family              |                 | Phylum                |                   |                       |              | Family                |              |                       |              |
|----------------------------------------|---------------------|-----------------|---------------------|-----------------|-----------------------|-------------------|-----------------------|--------------|-----------------------|--------------|-----------------------|--------------|
|                                        | Shotgun<br>Illumina | Amplicon<br>454 | Shotgun<br>Illumina | Amplicon<br>454 | Shotgun -<br>Illumina |                   | Amplicon -<br>454     |              | Shotgun -<br>Illumina |              | Amplicon -<br>454     |              |
|                                        |                     |                 |                     |                 | <i>r</i> <sup>2</sup> | <i>p</i>          | <i>r</i> <sup>2</sup> | <i>p</i>     | <i>r</i> <sup>2</sup> | <i>p</i>     | <i>r</i> <sup>2</sup> | <i>p</i>     |
| Chlorophyll (Clorof)                   | x                   |                 | x                   |                 | 0.319                 | <b>0.001</b>      | 0.043                 | 0.392        | 0.219                 | <b>0.006</b> | 0.033                 | 0.489        |
| Conductivity                           |                     |                 |                     |                 | 0.022                 | 0.623             | 0.002                 | 0.963        | 0.010                 | 0.811        | 0.027                 | 0.562        |
| Dissolved oxygen (DO)                  | x                   |                 | x                   | x               | 0.273                 | <b>0.002</b>      | 0.121                 | 0.068        | 0.250                 | <b>0.004</b> | 0.257                 | <b>0.002</b> |
| Dissolved oxygen saturated (DOsat)     | x                   |                 | x                   | x               | 0.294                 | <b>0.001</b>      | 0.093                 | 0.126        | 0.218                 | <b>0.006</b> | 0.190                 | <b>0.009</b> |
| Depth                                  | x                   | x               |                     |                 | 0.257                 | <b>0.004</b>      | 0.141                 | <b>0.039</b> | 0.043                 | 0.407        | 0.055                 | 0.311        |
| Dissolved inorganic nitrogen (DIN)     | x                   | x               |                     |                 | 0.326                 | <b>&lt; 0.001</b> | 0.154                 | <b>0.026</b> | 0.037                 | 0.447        | 0.100                 | 0.114        |
| NH <sub>4</sub>                        | x                   |                 | x                   | x               | 0.298                 | <b>0.002</b>      | 0.078                 | 0.187        | 0.059                 | 0.284        | 0.034                 | 0.482        |
| NO <sub>3</sub>                        | x                   |                 |                     |                 | 0.145                 | <b>0.045</b>      | 0.160                 | <b>0.026</b> | 0.058                 | 0.282        | 0.106                 | 0.100        |
| pH                                     | x                   | x               |                     |                 | 0.075                 | 0.197             | 0.059                 | 0.283        | 0.236                 | <b>0.003</b> | 0.197                 | <b>0.009</b> |
| PO <sub>4</sub>                        |                     |                 | x                   | x               | 0.004                 | 0.926             | 0.023                 | 0.617        | 0.004                 | 0.924        | 0.020                 | 0.653        |
| Temperature (Tempar)                   |                     |                 |                     |                 | 0.027                 | 0.568             | 0.108                 | 0.094        | 0.138                 | <b>0.044</b> | 0.121                 | 0.068        |
| Temperature H <sub>2</sub> O (TempH2O) |                     |                 | x                   |                 | 0.027                 | 0.567             | 0.090                 | 0.138        | 0.163                 | <b>0.023</b> | 0.123                 | 0.068        |
| Total nitrogen (TN)                    |                     |                 | x                   |                 | 0.262                 | <b>0.003</b>      | 0.081                 | 0.182        | 0.209                 | <b>0.007</b> | 0.035                 | 0.463        |
| Total phosphate (TP)                   | x                   |                 | x                   |                 | 0.310                 | <b>&lt; 0.001</b> | 0.012                 | 0.766        | 0.214                 | <b>0.006</b> | 0.020                 | 0.641        |
| Turbidity (Turb)                       | x                   |                 | x                   |                 | 0.223                 | <b>0.007</b>      | 0.032                 | 0.508        | 0.080                 | 0.178        | 0.013                 | 0.756        |
| Z. euphotic (Zeu)                      | x                   |                 |                     |                 | 0.211                 | <b>0.007</b>      | 0.147                 | <b>0.034</b> | 0.121                 | 0.068        | 0.113                 | 0.080        |
| Z. max. (Zmax)                         | x                   | x               |                     |                 | 0.257                 | <b>0.004</b>      | 0.141                 | <b>0.039</b> | 0.043                 | 0.407        | 0.055                 | 0.311        |
| Floodplain*                            | x                   | x               |                     |                 | 0.238                 | <b>0.003</b>      | 0.092                 | 0.110        | 0.158                 | <b>0.003</b> | 0.111                 | <b>0.006</b> |
| Total significant                      | 13                  | 5               | 9                   | 4               | 13                    |                   | 5                     |              | 9                     |              | 4                     |              |

**Supplementary Table 2.** Total number of taxa found and taxon richness estimates at the phylum and family levels for amplicon and shotgun data (S.E. = standard errors).

| <b>Rank</b> | <b>Method</b> | <b>Taxa found</b> | <b>Chao</b> | <b>Jackknife 1</b> | <b>Jackknife 2</b> | <b>Bootstrap</b> |
|-------------|---------------|-------------------|-------------|--------------------|--------------------|------------------|
| Phylum      | Amplicon      | 20                | 20.0        | 20.0               | 20.0               | 20.0             |
|             | S.E.          |                   | 0.0         | 0.0                |                    | 0.0              |
|             | Shotgun       | 9                 | 14.9        | 12.9               | 16.8               | 10.5             |
|             | S.E.          |                   | 7.0         | 2.4                |                    | 1.2              |
| Family      | Amplicon      | 56                | 56.0        | 56.0               | 56.0               | 56.0             |
|             | S.E.          |                   | 0           | 0                  |                    | 0.1              |
|             | Shotgun       | 41                | 54.2        | 49.8               | 55.6               | 44.9             |
|             | S.E.          |                   | 12.2        | 3.3                |                    | 1.7              |

**Supplementary Table 3.** Sample information for the lakes reviewed in our analyses.

| <b>Locale</b>    | <b>River</b> | <b>Date</b> |
|------------------|--------------|-------------|
| Cadete           | Amazon       | Oct. 2011   |
| Calado           | Amazon       | Oct. 2011   |
| Castanho         | Amazon       | Oct. 2011   |
| Comprido         | Amazon       | Oct. 2011   |
| Fuxico           | Amazon       | Oct. 2011   |
| Grande I         | Amazon       | Oct. 2011   |
| Grande II        | Amazon       | Oct. 2011   |
| Grande II        | Amazon       | May. 2012   |
| Lagoa V          | Amazon       | Oct. 2011   |
| Monte Cristo     | Amazon       | Oct. 2011   |
| Piranha          | Amazon       | Oct. 2011   |
| Poço Curuçá      | Amazon       | Oct. 2011   |
| Poraquequara I   | Amazon       | Oct. 2011   |
| Poraquequara II  | Amazon       | Oct. 2011   |
| Poraquequara III | Amazon       | Oct. 2011   |
| Rio Amazonas     | Amazon       | Oct. 2011   |
| Rio Negro        | Amazon       | Oct. 2011   |
| Rio Solomon      | Amazon       | Oct. 2011   |
| Tatuí            | Amazon       | Oct. 2011   |
| Tatuí            | Amazon       | May. 2012   |
| Crixás I         | Araguaia     | Nov. 2011   |
| Crixás II        | Araguaia     | Nov. 2011   |
| Crixás III       | Araguaia     | Nov. 2011   |
| Crixás IV        | Araguaia     | Nov. 2011   |
| Goiaba           | Araguaia     | Mar. 2012   |
| Goiaba           | Araguaia     | Nov. 2011   |
| Luís Alves II    | Araguaia     | Nov. 2011   |
| Montaria III     | Araguaia     | Nov. 2011   |
| Albuquerque      | Pantanal     | Mar. 2012   |
| Cáceres          | Pantanal     | Mar. 2012   |

|                |          |            |
|----------------|----------|------------|
| Figueira       | Pantanal | Mar. 2012  |
| Ilha Grande    | Pantanal | Mar. 2012  |
| Miranda I      | Pantanal | Mar. 2012  |
| Paraguai River | Pantanal | Mar. 2012  |
| Piúva          | Pantanal | Mar. 2012  |
| Tuiuiú         | Pantanal | Mar. 2012  |
| Aurélio        | Paraná   | Sept. 2011 |
| Boca do Ipoitã | Paraná   | Sept. 2011 |
| Fechada        | Paraná   | Sept. 2011 |
| Gavião         | Paraná   | Sept. 2011 |
| Guaraná        | Paraná   | Sept. 2011 |
| M Luiza        | Paraná   | Sept. 2011 |
| Onça           | Paraná   | Sept. 2011 |
| P Garças       | Paraná   | Sept. 2011 |
| Patos          | Paraná   | Feb. 2012  |
| Peroba         | Paraná   | Sept. 2011 |
| Porcos         | Paraná   | Sept. 2011 |
| Sumida         | Paraná   | Sept. 2011 |
| Ventura        | Paraná   | Sept. 2011 |
